# Supplementary material for: A Scoping Review: The Impact of Housing Systems and Environmental Features on Beef Cattle Welfare
Source: PubMed Central journal article supplement (PMC7222360; doi:10.3390/ani10040565), 2020-03-27
Supplement: animals-10-00565-s001.pdf [file animals-10-00565-s001.pdf]

**Supplementary**

**Table 1.** Population parameters of the studies evaluated. Shown are the descriptions or values provided by the original authors of the articles these studies were chosen from.

| First Author (year); Country            | Housing System     | Production Stage | Experiment Length | Number of Animals (n) | Cattle Sex (cattle age) | Cattle Breed                                | Significant Results |
|-----------------------------------------|--------------------|------------------|-------------------|-----------------------|-------------------------|---------------------------------------------|---------------------|
| Housing systems                         |                    |                  |                   |                       |                         |                                             |                     |
| Andrighetto (1999); Italy [20]          | Crates; Pens       | Veal             | 102 days          | 34                    | Bull calves (<1 year)   | Holstein                                    | Yes                 |
| Blumetto (2017); Uruguay [19]           | Pasture; Feedlot   | Fattening        | 133 days          | 48                    | Steer (<1 year)         | Holstein                                    | Yes                 |
| Braghieri (2011); Italy [17]            | Pasture; Feedlot   | Fattening        | 6 months          | 12                    | Bull (<1 year)          | Podolian                                    | Yes                 |
| Ferrante (1999); Italy [16]             | Crates; Pens       | Veal             | Not provided      | 24                    | Bull calves (<1 year)   | Holstein                                    | Yes                 |
| Johnson (2011); USA [18]                | Hoop barn; Feedlot | Fattening        | 20 months         | 960                   | Steer (not provided)    | Crossbred steers; predominantly Angus       | Yes                 |
| Tuomisto (2008); Finland [13]           | Pasture; barn      | Fattening        | 11 months         | 20                    | Bull (<1 year)          | Hereford                                    | Yes                 |
| Tuomisto (2015); Finland [15]           | Pasture; feedlot   | Fattening        | 62 days           | 29                    | Bull (1–2 years)        | Hereford                                    | Yes                 |
| Starvaggi Cucuzza (2014); Italy [21]    | Feedlot            | Fattening        | Not provided      | 12                    | Bull (<1 year)          | Piemontese                                  | Yes                 |
| Space allowance                         |                    |                  |                   |                       |                         |                                             |                     |
| Fisher (1997); Ireland [25]             | Feedlot            | Fattening        | 104 days          | 32                    | Heifer (not provided)   | Charolais, Simmental and Hereford crossbred | Yes                 |
| Fisher (1997); Ireland [26]             | Feedlot            | Fattening        | 140 days          | 96                    | Heifer (not provided)   | Simmental cross                             | Yes                 |
| Hickey (2003); Ireland [23]             | Feedlot            | Fattening        | 97 days           | 75                    | Steer (not provided)    | Holstein                                    | Yes                 |
| Keane (2017); Ireland [27]              | Feedlot            | Fattening        | 105 days          | 240                   | Heifer (1–2 years)      | Crossbred                                   | Yes                 |
| Keane (2018); Ireland [24]              | Pasture; Feedlot   | Fattening        | 105 days          | 120                   | Steer (1–2 years)       | Charolais crossbred; Limousin crossbred     | Yes                 |
| Ruis-Heutineck (2000); Netherlands [22] | Feedlot            | Fattening        | 11 months         | 192                   | Bull (<1 year)          | Piemontese x Black and White crossbred      | Yes                 |
| Flooring                                |                    |                  |                   |                       |                         |                                             |                     |
| Brcsic (2015); Italy [38]               | Feedlot            | Fattening        | 9 months          | 326                   | Bull (not provided)     | Charolais; Limousin                         | Yes                 |
| Brcsic (2015); Italy [45]               | Feedlot            | Fattening        | 1 month           | 1440                  | Bull (not provided)     | Charolais and French crossbred              | Yes                 |

|                                         |           |           |           |       |                               |                                                                                                                                                                      |     |
|-----------------------------------------|-----------|-----------|-----------|-------|-------------------------------|----------------------------------------------------------------------------------------------------------------------------------------------------------------------|-----|
|                                         | Feedlot   | Fattening | 4 months  | 1800  | Bull<br>(not provided)        | Charolais and French crossbred                                                                                                                                       | Yes |
| Cozzi (2005); Italy [46]                | Feedlot   | Fattening | 7 months  | 1,338 | Bull<br>(not provided)        | Charolais                                                                                                                                                            | Yes |
| Cozzi (2013); Italy [47]                | Feedlot   | Fattening | 7 months  | 48    | Bull<br>(1–2 years)           | Charolais and Aubrac crossbred                                                                                                                                       | Yes |
| Earley (2015); Ireland [48]             | Feedlot   | Fattening | 105 days  | 240   | Heifer<br>(1–2 years)         | Continental cross;<br>Holstein                                                                                                                                       | Yes |
| Earley (2017); Ireland [49]             | Feedlot   | Fattening | 7 months  | 360   | Steer<br>(not provided)       | Continental crossbred                                                                                                                                                | Yes |
| Elmore (2005); USA [41]                 | Feedlot   | Fattening | 3 months  | 48    | Steer<br>(<1 year)            | Angus cross                                                                                                                                                          | Yes |
| Hickey (2003); Ireland [23]             | Feedlot   | Fattening | 97 days   | 75    | Steer<br>(not provided)       | Holstein                                                                                                                                                             | No  |
| Keane (2015); Ireland [40]              | Feedlot   | Fattening | 148 days  | 72    | Bull<br>(not provided)        | Simmental crossbred                                                                                                                                                  | Yes |
| Keane (2017); Ireland [27]              | Feedlot   | Fattening | 105 days  | 240   | Heifer<br>(1–2 years)         | Crossbred                                                                                                                                                            | Yes |
| Platz (2007); Germany [39]              | Feedlot   | Fattening | 1 year    | 18    | Bull<br>(<1 year)             | Holstein and Fleckvieh crossbred                                                                                                                                     | Yes |
| Ruis-Heutineck (2000); Netherlands [22] | Feedlot   | Fattening | 11 months | 192   | Bull<br>(<1 year)             | Piemontese x Black and White crossbred                                                                                                                               | Yes |
| Tessitore (2009); Italy [50]            | Feedlot   | Fattening | 15 months | 2,700 | Bull<br>(<1 year)             | Charolais and French crossbred                                                                                                                                       | Yes |
| Lowe (2001); Ireland [42]               | Feedlot   | Fattening | 140 days  | 60    | Steer<br>(not provided)       | Continental cross                                                                                                                                                    | Yes |
|                                         | Feedlot   | Fattening | 142 days  | 80    | Steer<br>(not provided)       | Continental cross                                                                                                                                                    | Yes |
| Yang (2017); South Korea [51]           | Open barn | Fattening | 6 months  | 12    | Steer;<br>Heifer<br>(<1 year) | Hanwoo                                                                                                                                                               | Yes |
| Shade                                   |           |           |           |       |                               |                                                                                                                                                                      |     |
| Blaine (2011); South Africa [28]        | Feedlot   | Fattening | 36 days   | 146   | Bull; Steer<br>(<1 year)      | Bonsmara crossbred                                                                                                                                                   | Yes |
| Bond (1975); USA [12]                   | Feedlot   | Fattening | 86 days   | 112   | Bull<br>(not provided)        | Red Poll;<br>Brown Swiss;<br>Simmental and Hereford crossbred;<br>Simmental and Angus crossbred;<br>Limousin and Hereford crossbred;<br>Limousin and Angus crossbred | No  |

|                                      |         |           |          |       |                                         |                                                                                                                                                                       |     |
|--------------------------------------|---------|-----------|----------|-------|-----------------------------------------|-----------------------------------------------------------------------------------------------------------------------------------------------------------------------|-----|
|                                      | Feedlot | Fattening | 84 days  | 120   | Bull<br>(not<br>provided)               | Simmental<br>and<br>Hereford<br>crossbred;<br>Simmental<br>and Angus<br>crossbred;<br>Limousin<br>and<br>Hereford<br>crossbred;<br>Limousin<br>and Angus<br>crossbred | No  |
| Brown-Bandl<br>(2005); USA<br>[32]   | Feedlot | Fattening | 37 days  | 8     | Steer<br>(not<br>provided)              | Crossbred (¼<br>Angus, ¼<br>Hereford; ¼<br>Pinzsauer; ¼<br>Red Poll)                                                                                                  | Yes |
| Gaughan<br>(2010);<br>Australia [29] | Feedlot | Fattening | 120 days | 164   | Steer<br>(1–2 years)                    | Angus                                                                                                                                                                 | Yes |
| Hagenmaier<br>(2016); USA<br>[30]    | Feedlot | Fattening | 1 month  | 1,395 | Steer;<br>Heifer<br>(not<br>provided)   | Not<br>provided;<br>predominate<br>ly black<br>hided                                                                                                                  | Yes |
| Mitlöchner<br>(2002); USA<br>[31]    | Feedlot | Fattening | 121 days | 168   | Heifer<br>(not<br>provided)             | Angus<br>crossbred;<br>Charolais<br>crossbred                                                                                                                         | Yes |
| Van Iaer (2015);<br>Belgium [14]     | Pasture | Cow-calf  | 2 years  | 30    | Cow<br>(Ranged<br>from 2 to 7<br>years) | Belgian Blue                                                                                                                                                          | No  |
| Miscellaneous features               |         |           |          |       |                                         |                                                                                                                                                                       |     |
| Khongdee<br>(2016);<br>Thailand [36] | Barn    | Fattening | 157 days | 10    | Heifer<br>(2–3 years)                   | Hindu<br>Brazil-<br>Brahman<br>crosses                                                                                                                                | Yes |
| Magrin (2017);<br>Italy [33]         | Feedlot | Fattening | 98 days  | 69    | Bull<br>(not<br>provided)               | Charolais                                                                                                                                                             | Yes |
| Ninomiya<br>(2009); Japan<br>[34]    | Feedlot | Fattening | 65 days  | 20    | Steer<br>(<1 year)                      | Japanese<br>black;<br>Japanese<br>Shorthorn                                                                                                                           | Yes |
| Wilson (2002);<br>USA [35]           | Feedlot | Fattening | 22 days  | 30    | Heifer<br>(1–2 years)                   | Charolais<br>cross                                                                                                                                                    | Yes |



|                                    |   |                                                                    |        |   |                                 |                    |                 |     |                                                                                      |
|------------------------------------|---|--------------------------------------------------------------------|--------|---|---------------------------------|--------------------|-----------------|-----|--------------------------------------------------------------------------------------|
| Duration                           | - | >DL,<br>FSRM,<br>OP,<br>PSRM <sup>7</sup><br>and<br>PRM;<br><SRMPC | -      | - | -                               | -                  | <EVA and<br>DUR | -   | {50} i, {38} h, {39} i, {49} h, {47} i, {41} i, Italy, Germany, Ireland, USA {22} i, |
| Frequency                          | - | <FSRM<br>and S                                                     | <S     | - | -                               | -                  | -               | -   | Netherlands {48} i, {27} i, {49} h, Ireland                                          |
| Proportion Mounting                | - | <ICE and S                                                         | -      | - | >DL, EVA,<br>FSC, OP<br>and DUR | >DL                | -               | -   | {45} h, {50} i, {38} h, {48} i, {47} i, Italy, Ireland {48} i, Ireland               |
| Duration                           | - | <DL,<br>FSRM,<br>EasyFix<br>and PRM                                | -      | - | -                               | -                  | -               | -   | {45} h, {50} i, {38} h, {48} i, {47} i, Italy, Ireland {48} i, Ireland               |
| Proportion                         | - | -                                                                  | -      | - | -                               | >DL and<br>EasyFix | -               | -   | {41} i, USA                                                                          |
| Postural changes Resting           | - | <FSRM                                                              | >SRMPC | - | -                               | -                  | -               | -   | {38} h, Italy                                                                        |
| Proportion Standing                | - | >FSRM                                                              | -      | - | -                               | -                  | -               | -   | {50} i, Italy                                                                        |
| Duration                           | - | <DL                                                                | -      | - | -                               | -                  | -               | -   | {38} h, Italy                                                                        |
| Unsuccessful lying event Frequency | - | >FSRM                                                              | -      | - | -                               | -                  | -               | -   | {38} h, Italy                                                                        |
| <hr/>                              |   |                                                                    |        |   |                                 |                    |                 |     |                                                                                      |
| Productivity                       |   |                                                                    |        |   |                                 |                    |                 |     |                                                                                      |
| Average daily gain                 | - | <FSRM,<br>PRM and S                                                | -      | - | -                               | -                  | -               | -   | {38} h, {40} h, {47} i, {27} i, Italy, Ireland {49} h, Ireland                       |
| Dry matter intake                  | - | <OP                                                                | -      | - | <OP                             | -                  | >EVA and<br>DUR | -   | {40} h, {27} i, Ireland                                                              |
| Feed conversion ratio              | - | < FSRM<br>and S                                                    | -      | - | -                               | -                  | -               | -   | {38, 27, 22, 51} i, South Korea {49} h, {40} h, {22} i, Ireland, Netherlands         |
| Final live weight                  | - | <FSRM,<br>PRM and S                                                | >S     | - | -                               | -                  | -               | >RH |                                                                                      |
| Live weight gain                   | - | <EVA,<br>FSRM,<br>OP and<br>DUR                                    | >S     | - | <EVA, OP<br>and DUR             | -                  | >EVA and<br>DUR | -   |                                                                                      |
| <hr/>                              |   |                                                                    |        |   |                                 |                    |                 |     |                                                                                      |
| Product quality                    |   |                                                                    |        |   |                                 |                    |                 |     |                                                                                      |
| Carcass gain                       | - | <FSRM                                                              | -      | - | -                               | -                  | -               | -   | {40} h, Ireland {27} i, Ireland                                                      |
| Carcass weight                     | - | <S                                                                 | -      | - | -                               | -                  | -               | -   | {40} h, {27} i, Ireland                                                              |
| Hide weight                        | - | <FSRM<br>and S                                                     | -      | - | -                               | -                  | -               | -   | {40} h, Ireland                                                                      |
| Kidney and channel fat weights     | - | <FSRM                                                              | -      | - | -                               | -                  | -               | -   | {40} h, Ireland                                                                      |
| <hr/>                              |   |                                                                    |        |   |                                 |                    |                 |     |                                                                                      |
| Physiology                         |   |                                                                    |        |   |                                 |                    |                 |     |                                                                                      |
| Total serum protein                | - | >S                                                                 | -      | - | -                               | -                  | -               | -   | {27} i, Ireland                                                                      |
| <hr/>                              |   |                                                                    |        |   |                                 |                    |                 |     |                                                                                      |
| Health                             |   |                                                                    |        |   |                                 |                    |                 |     |                                                                                      |
| Bursitis prevalence                | - | >DL and<br>FSRM                                                    | -      | - | -                               | -                  | -               | -   | {45} h, {38} h, Italy                                                                |

|                                    |            |                                      |                    |                        |             |               |              |   |                                                                                                                         |
|------------------------------------|------------|--------------------------------------|--------------------|------------------------|-------------|---------------|--------------|---|-------------------------------------------------------------------------------------------------------------------------|
| Early culling (%)                  | -          | >DL                                  | -                  | -                      | -           | -             | -            | - | {45} <sup>h</sup> , Italy                                                                                               |
| Gait scores                        | -          | >FSRM                                | <SRMPC             | -                      | -           | -             | -            | - | {32} <sup>i</sup> , USA                                                                                                 |
| Hairless patch prevalence          | -          | >DL                                  | -                  | -                      | -           | -             | -            | - | {45} <sup>h</sup> , Italy                                                                                               |
| Hock swelling scores               | -          | >FSRM                                | <SRMPC             | -                      | -           | -             | -            | - | {41} <sup>i</sup> , USA                                                                                                 |
| Hoof erosion                       | -          | <ICE                                 | -                  | -                      | >DL and FSC | >DL           | -            | - | {48} <sup>i</sup> , Ireland                                                                                             |
| Hoof lesion prevalence             | -          | <DL, EVA, FSRM, EasyFix, DUR and ICE | >S                 | -                      | -           | -             | -            | - | {48} <sup>i</sup> , {49} <sup>h</sup> , {40} <sup>h</sup> , Ireland                                                     |
| Hoof overgrowth prevalence         | -          | <FSRM, EasyFix and ICE               | -                  | -                      | >DL         | -             | -            | - | {38} <sup>h</sup> , {48} <sup>i</sup> , Italy, Ireland                                                                  |
| Hygiene score                      | >PSF and S | <DL, OP and SRMPC; >ICE              | <SRMPC; >S         | >S and SS <sup>8</sup> | <OP         | <DL; >EasyFix | >EVA and DUR | - | {46} <sup>h</sup> , {42} <sup>h</sup> , {48} <sup>i</sup> , {49} <sup>h</sup> , {41} <sup>i</sup> , Italy, Ireland, USA |
| Knee swelling                      | -          | >FSRM                                | <SRMPC             | -                      | -           | -             | -            | - | {41} <sup>i</sup> , USA                                                                                                 |
| Lesions / swelling prevalence      | -          | >DL, FSRM and PSRM; <SRMPC           | <SRMPC             | -                      | -           | -             | -            | - | {45} <sup>h</sup> , {39} <sup>i</sup> , {41} <sup>i</sup> , Italy, Germany, USA                                         |
| Nasal discharge prevalence         | -          | <DL                                  | -                  | -                      | -           | -             | -            | - | {45} <sup>h</sup> , Italy                                                                                               |
| Pen cleanliness                    | -          | Cleaner than FSRM and SRMPC          | Cleaner than SRMPC | -                      | -           | -             | -            | - | {41} <sup>i</sup> , USA                                                                                                 |
| Severe lesions prevalence          | -          | >FSRM                                | <S                 | -                      | -           | -             | -            | - | {22} <sup>i</sup> , Netherlands                                                                                         |
| Slipping events                    | -          | >PC and PRM                          | -                  | -                      | -           | -             | -            | - | {47} <sup>g</sup> , Italy                                                                                               |
| Treatments for locomotor disorders | -          | -                                    | -                  | -                      | -           | -             | -            | - | -                                                                                                                       |
| Proportion                         | -          | > FSRM                               | -                  | -                      | -           | -             | -            | - | {38} <sup>h</sup> , Italy                                                                                               |

<sup>1</sup> Deep litter; <sup>2</sup> Rice husks; <sup>3</sup> Wood shavings; <sup>4</sup> Foam structure rubber mat; <sup>5</sup> Rubber mat (Durapak); <sup>6</sup> Solid rubber mat—partial cover; <sup>7</sup> Partially slatted rubber mats; <sup>8</sup> Strips of rubber secured to slats; <sup>h</sup> Age not provided; <sup>i</sup> <1 year; <sup>j</sup> 1–2 years.

## Supplementary References

1. Angrecka, S.; Herbut, P.; Nawalany, G.; Sokołowski, P. The impact of localization and barn type on insolation of sidewall stalls during summer. *J. Ecol. Eng.* **2017**, *18*, 60–66, doi:10.12911/22998993/74398.
2. Angrecka, S.; Herbut, P. Impact of barn orientation on insolation and temperature of stalls surface. *Ann. Anim. Sci.* **2016**, *16*, 887–896, doi:10.1515/aoas-2015-0096.

3. Scientific Committee on Animal Health and Animal Welfare (SCAHAW): The welfare of cattle kept for beef production. Available online: [http://ec.europa.eu/food/fs/sc/scah/out54\\_en.pdf](http://ec.europa.eu/food/fs/sc/scah/out54_en.pdf) (accessed on 19 October 2018).
4. European Food Safety Authority (EFSA) Panel on Animal Health and Welfare. Scientific opinion on the welfare of cattle kept for beef production and the welfare in intensive calf farming systems. *EFSA J.* **2012**, *10*, 1–165.
5. European Food Safety Authority (EFSA). Scientific Opinion of the Panel on Animal Health and Welfare (AHAW Panel) on a request from the European Commission on the risks of poor welfare in intensive calf farming systems. An update of the Scientific Veterinary Committee Report on the Welfare of Calves. *EFSA J.* **2006**, *366*, 1–36.
6. Lonne Ingvarsten, K.; Refsgaard Anderson, H. Space allowance and type of housing for growing cattle: A review of performance and possible relation to neuroendocrine function. *Acta Agric. Scand.* **1993**, *43*, 65–80, doi:10.1080/09064709309410147.
7. O'Connor, A.M.; Anderson, K.M.; Goodell, C.K.; Sargeant, J.M. Conducting systematic reviews of intervention questions I: Writing the review protocol, formulating the question and searching the literature. *Zoonoses Public Health* **2014**, *61*, 28–38, doi:10.1111/zph.12125.
8. Sargeant, J.M.; O'Connor, A.M. Conducting systematic reviews of intervention questions II: Relevance screening, data extraction, assessing risk of bias, presenting the results and interpreting the findings. *Zoonoses Public Health*. **2014**, *61*, 39–51, doi:10.1111/zph.12124.
9. Broom, D.M. Coping, stress and welfare. In *Coping with Challenge: Welfare in Animals including Humans*; Broom, D.M., Ed.; Dahlem University Press: Berlin, Germany, 2001.
10. Ouzzani, M.; Hammady, H.; Fedorowicz, Z.; Elmagarmid, A. Rayyan—A web and mobile app for systematic reviews. *Syst. Rev.* **2016**, *5*, 210, doi:10.1186/s13643-016-0384-4.
11. Higgins, J.P.T.; Altman, D.G.; Gøtzsche, P.C.; Jüni, P.; Moher, D.; Oxman, A.D.; Savović, J.; Schulz, K.F.; Weeks, L.; Sterne, J.A.C.; Cochrane Bias Methods Group and Cochrane Statistical Methods Group. The Cochrane Collaboration's tool for assessing risk of bias in randomised trials. *BMJ* **2011**, *343*, d5928, doi:10.1136/bmj.d5928.
12. Bond, T.E.; Laster, D.B. Influence of shading on production of Midwest feedlot cattle. *Trans. ASAE* **1975**, *18*, 957–959.
13. Tuomisto, L.; Ahola, L.; Martiskainen, P.; Kauppinen, R.; Huuskonen, A. Comparison of time budgets of growing Hereford bulls in an uninsulated barn and in extensive forest paddocks. *Livest. Sci.* **2008**, *118*, 44–52, doi:10.1016/j.livsci.2008.01.011.
14. Van Iaer, E.; Moons, C.P.H.; Ampe, B.; Sonck, B.; Vandaele, L.; De Campeneere, S.; Tuytens, F.A.M. Effect of summer conditions and shade on behavioural indicators of thermal discomfort in Holstein dairy and Belgian Blue beef cattle on pasture. *Animal* **2015**, *9*, 1536–1546, doi:10.1017/S1751731115000804.
15. Tuomisto, L.; Mononen, J.; Martiskainen, P.; Ahola, L.; Huuskonen, A. Time budgets of finishing bulls housed in an uninsulated barn or at pasture. *Agr. Food Sci.* **2015**, *24*, 173–182.
16. Ferrante, V.; Canali, E.; Verga, M.; Mattiello, S.; Menti, F.; Gottardo, F. Veal calves rearing: Behavioural, physiological and pathological indicators. In Proceedings of the A.S.P.A. XII Congress, Piacenza, Italy, 21–24 June 1999; pp. 575–577.
17. Braghieri, A.; Pacelli, C.; De Rosa, G.; Girolami, A.; De Palo, P.; Napolitano, F. Podolian beef production on pasture and in confinement. *Animal* **2011**, *5*, 927–937, doi:10.1017/S1751731110002685.
18. Johnson, A.; Lonergan, S.M.; Busby, W.D.; Shouse, S.C.; Maxwell, D.L. Comparison of steer behavior when housed in a deep-bedded hoop barn versus an open feedlot with shelter. *J. Anim. Sci.* **2011**, *89*, 1893, doi:10.2527/jas.2010-2877.
19. Blumetto, O.; Ruggia, A.; Morales Pyñeyría, J.T.; Villagrà García, A. Social behavior and productive and stress parameters in Holstein steers fattened in three contrasting production systems. *J. Agric. Sci.* **2017**, *9*, 54–64, doi:10.5539/jas.v9n5p54.
20. Andrighetto, I.; Gottardo, F.; Andreoli, D.; Cozzi, G. Effect of type of housing on veal calf growth performance, behaviour and meat quality. *Livest. Prod. Sci.* **1999**, *57*, 137–145.
21. Starvaggi Cucuzza, L.; Riondato, F.; Macchi, E.; Bellino, C.; Franco, G.; Biolatti, B.; Cannizzo, F.T. *Res. Vet. Sci.* **2014**, *97*, 465–470, doi:10.1016/j.rbsc.2014.08.002.
22. Ruis-Heutinck, L.F.M.; Smits, M.C.J.; Smits, A.C.; Heeres, J.J. Effects of floor type and floor area on behavior and carpal joint lesions in beef bulls. *Improv. Health Welf. Anim. Prod.* **2000**, *102*, 29–36.

23. Hickey, M.C.; Earley, B.; Fisher, A.D. The effect of floor type and space allowance on welfare indicators of finishing steers. *Ir. J. Agric. Food Res.* **2003**, *42*, 89–100.
24. Keane, M.P.; McGee, M.; O’Riordan, E.G.; Kelly, A.K.; Earley, B. Performance and welfare of steers housed on concrete slatted floors at fixed and dynamic (allometric based) space allowances. *J. Anim. Sci.* **2018**, *96*, 880–889, doi:10.1093/jas/sky007.
25. Fisher, A.D.; Crowe, M.A.; Prendiville, D.J.; Enright, W.J. Indoor space allowance: Effects on growth, behaviour, adrenal and immune responses of finishing beef heifers. *J. Anim. Sci.* **1997**, *64*, 53–62.
26. Fisher, A.D.; Crowe, M.A.; O’Kiely, P.; Enright, W.J. Growth, behaviour, adrenal and immune responses of finishing beef heifers housed on slatted floors at 1.5, 2.0, 2.5 or 3.0 m<sup>2</sup> space allowance. *Livest. Prod. Sci.* **1997**, *51*, 245–254.
27. Keane, M.P.; McGee, M.; O’Riordan, E.G.O.; Kelly, A.K.; Earley, B. Effect of space allowance and floor type on performance, welfare and physiological measurements of finishing beef heifers. *Animal* **2017**, *11*, 2285–2294, doi:10.1017/S1751731117001288.
28. Blaine, K.L.; Nsahlai, I.V. The effects of shade on performance, carcass classes and behaviour of heat-stressed feedlot cattle at the finisher phase. *Trop. Anim. Health Prod.* **2010**, *43*, 609–615, doi:10.1007/s11250-010-9740-x.
29. Gaughan, J.B.; Bonner, S.; Loxton, I.; Mader, T.L.; Lisle, A.; Lawrence, R. Effect of shade on body temperature and performance of feedlot steers. *J. Anim. Sci.* **2010**, *88*, 4056–4067, doi:10.2527/jas.2010-2987.
30. Hagenmaier, J.A.; Reinhardt, C.D.; Bartle, S.J.; Thomson, D.U. Effect of shade on animal welfare, growth performance, and carcass characteristics in large pens of beef cattle fed a beta agonist in a commercial feedlot. *J. Anim. Sci.* **2016**, *94*, 5064–5076, doi:10.2527/jas2016-0935.
31. Mitlöhner, F.M.; Galyean, M.L.; McGlone, J.J. Shade effects on performance, carcass traits, physiology, and behavior of heat-stressed feedlot heifers. *J. Anim. Sci.* **2002**, *80*, 2043–2050.
32. Brown-Brandl, T.M.; Eigenberg, R.A.; Nienaber, J.A.; Hahn, G.L. Dynamic response indicators of heat stress in shaded and non-shaded feedlot cattle, part 1: Analyses of indicators. *Biosyst. Eng.* **2005**, *90*, 451–462.
33. Brscic, M.; Gottardo, F.; Tessitore, E.; Guzzo, L.; Ricci, R.; Cozzi, G. Assessment of welfare of finishing beef cattle kept on different types of floor after short- or long-term housing. *Animal* **2015**, *9*, 1053–1058, doi:10.1017/S1751731115000245.
34. Ninomiya, S.; Sato, S. Effects of “Five Freedoms” environmental enrichment on the welfare of calves reared indoors. *J. Anim. Sci.* **2009**, *80*, 347–351, doi:10.1111/j.1740-0929.2009.00627.x.
35. Wilson, S.C.; Mitlöhner, F.M.; Morrow-Tesch, J.; Dailey, J.W.; McGlone, J.J. An assessment of several potential enrichment devices for feedlot cattle. *Appl. Anim. Beh. Sci.* **2002**, *76*, 259–265.
36. Cozzi, G.; Ricci, R.; Dorigo, M.; Zanet, D. Growth performance, cleanliness and lameness of finishing Charolais bulls housed in littered pens of different designs. *Ital. J. Anim. Sci.* **2005**, *4*, 251–253, doi:10.4081/ijas.2005.2s.251.
37. Da Costa, B.R.; Beckett, B.; Diaz, A.; Resta, N.M.; Johnston, B.C.; Egger, M.; Jüni, P.; Armijo-Olivo, S. Effect of standardized training on the reliability of the Cochrane risk of bias assessment tool: a prospective study. *Syst. Rev.* **2017**, *6*(44), <https://doi.org/10.1186/s13643-017-0441-7>.
38. Brscic, M.; Ricci, R.; Prevedello, P.; Lonardi, C.; De Nardi, R.; Contiero, B.; Gottardo, F.; Cozzi, G. Synthetic rubber surface as an alternative to concrete to improve welfare and performance of finishing beef cattle reared on fully slatted flooring. *Animal* **2015**, *9*, 1386–1392, doi:10.1017/S1751731115000592.
39. Platz, S.; Ahrens, F.; Bahrs, E.; Nüske, S.; Erhard, M.H. Association between floor type and behaviour, skin lesions, and claw dimensions in group-housed fattening bulls. *Prev. Vet. Med.* **2007**, *80*, 209–221, doi:10.1016/j.prevetmed.2007.02.007.
40. Keane, M.P.; McGee, M.; O’Riordan, E.G.; Kelly, A.K.; Earley, B. Effect of floor type on hoof lesions, dirt scores, immune response and production of beef bulls. *Livest. Sci.* **2015**, *180*, 220–225, doi:10.1016/j.livsci.2015.08.002.
41. Elmore, M.R.P.; Elischer, M.F.; Claeys, M.C.; Pajor, E.A. The effects of different flooring types on the behavior, health and welfare of finishing beef steers. *J. Anim. Sci.* **2005**, *93*, 1258–1266, doi:10.2527/jas2014-8399.
42. Lowe, D.E.; Steen, R.W.J.; Beattie, V.E.; Moss, B.W. The effects of floor type systems on the performance, cleanliness, carcass composition and meat quality of housed finishing beef cattle. *Livest. Prod. Sci.* **2001**, *69*, 33–42.



43. Institute of Medicine (U.S.). Committee on Standards for Systematic Reviews of Comparative Effectiveness Research. In *Finding What Works in Health Care: Standards for Systematic Reviews*; National Academies Press: Washington, DC, USA, 2011.
44. Rethlefsen, M.L.; Farrell, A.M.; Osterhaus Trzasko, L.C.; Brigham, T.J. Librarian co-authors correlated with higher quality reported search strategies in general internal medicine systematic reviews. *J. Clin. Epidemiol.* **2015**, *68*, 617–626, doi:10.1016/j.jclinepi.2014.11.025.
45. Brscic, M.; Gottardo, F.; Tessitore, E.; Guzzo, L.; Ricci, R.; Cozzi, G. Assessment of welfare of finishing beef cattle kept on different types of floor after short- or long-term housing. *Animal* **2015**, *9*, 1053–1058, doi:10.1017/S1751731115000245.
46. Cozzi, G.; Ricci, R.; Dorigo, M.; Zanet, D. Growth performance, cleanliness and lameness of finishing Charolais bulls housed in littered pens of different designs. *Ital. J. Anim. Sci.* **2005**, *4*, 251–253, doi:10.4081/ijas.2005.2s.251.
47. Cozzi, G.; Tessitore, E.; Contiero, B.; Ricci, R.; Gottardo, F.; Brscic, M. Alternative solutions to the concrete fully-slatted floor for the housing of finishing beef cattle: Effects on growth performance, health of the locomotor system and behaviour. *Vet. J.* **2013**, *197*, 211–215, doi:10.1016/j.tvjl.2013.03.001.
48. Earley, B.; McNamara, J.D.; Jerrams, S.J.; O-Riordan, E.G. Effect of concrete slats, three mat types and out-wintering pads on performance and welfare of finishing beef steers. *Acta Vet. Scand.* **2017**, *59*, 1–14, doi:10.1186/s13028-017-0302-3.
49. Khongdee, T. Effects of roof modifications on growth performance and physiological changes of crossbred beef heifers (*Bos indicus*). *Songklanakarin. J. Sci. Technol.* **2016**, *38*, 183–188.
50. Tessitore, E.; Boukha, A.; Guzzo, L.; Cozzi, G. Differences in behavior, health status and productive performance of beef young bulls housed on different type of floor and assessed in two fattening phases. *Ital. J. Anim. Sci.* **2009**, *8*, 39–57.
51. Yang, K.Y.; Park, K.; Ha, J.J.; Gotoh, T.; Song, Y.H. Effect of pen floor material on the behavior of Hanwoo cattle. *J. Fac. Agr. Kyushu Univ.* **2017**, *1*, 99–103.

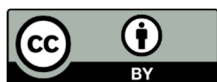

© 2020 by the authors. Submitted for possible open access publication under the terms and conditions of the Creative Commons Attribution (CC BY) license (<http://creativecommons.org/licenses/by/4.0/>).
